# Supplementary material for: Electrocatalytic Oxygen Reduction Reaction of Graphene Oxide and Metal-Free Graphene in an Alkaline Medium
Source: MDPI journal article supplement (doi:10.3390/nano13081315), 2023-04-08
Supplement: s1 [file s1]

# Electrocatalytic Oxygen Reduction Reaction of Graphene Oxide and Metal-Free Graphene in an Alkaline Medium

Saravanan Nagappan <sup>1,\*</sup>, Malarkodi Duraivel <sup>2</sup>, SeongHoon Han <sup>3</sup>, Mohammad Yusuf <sup>1</sup>, Manjiri Mahadadalkar <sup>1</sup>, KyeongMun Park <sup>1</sup>, Amarajothi Dhakshinamoorthy <sup>4</sup>, Kandasamy Prabakar <sup>2</sup>, Sungkyun Park <sup>3</sup>, Chang-Sik Ha <sup>5</sup>, Jae-Myung Lee <sup>6</sup> and Kang Hyun Park <sup>1,\*</sup>

- <sup>1</sup> Department of Chemistry, Chemistry Institute for Functional Materials, Pusan National University, 2 Busandaehak-ro 63beon-gil, Geumjeong-Gu, Busan 46241, Republic of Korea; yusuf.chem.kor@gmail.com (M.Y.); manjeeri@gmail.com (M.M.); pkmkm951@naver.com (K.P.)
- <sup>2</sup> Department of Electrical Engineering, Pusan National University, 2 Busandaehak-ro 63beon-gil, Geumjeong-Gu, Busan 46241, Republic of Korea; malarshalu94@gmail.com (M.D.); prabakar@pusan.ac.kr (K.P.)
- <sup>3</sup> Department of Physics, Pusan National University, 2 Busandaehak-ro 63beon-gil, Geumjeong-Gu, Busan 46241, Republic of Korea; han1411@pusan.ac.kr (S.H.); psk@pusan.ac.kr (S.P.)
- <sup>4</sup> School of Chemistry, Madurai Kamaraj University, Palkalai Nagar, Madurai 625021, Tamil Nadu, India; admguru@gmail.com (A.D.)
- <sup>5</sup> Department of Polymer Science and Engineering, Pusan National University, 2 Busandaehak-ro 63beon-gil, Geumjeong-Gu, Busan 46241, Republic of Korea; csha@pusan.ac.kr (C.-S.H.)
- <sup>6</sup> Department of Naval Architecture and Ocean Engineering, Pusan National University, Busan 46241, Republic of Korea; jaemlee@pusan.ac.kr (J.-M.L.)
- \* Correspondence: saravananagappan@gmail.com (S.N.); chemistry@pusan.ac.kr (K.H.P.)

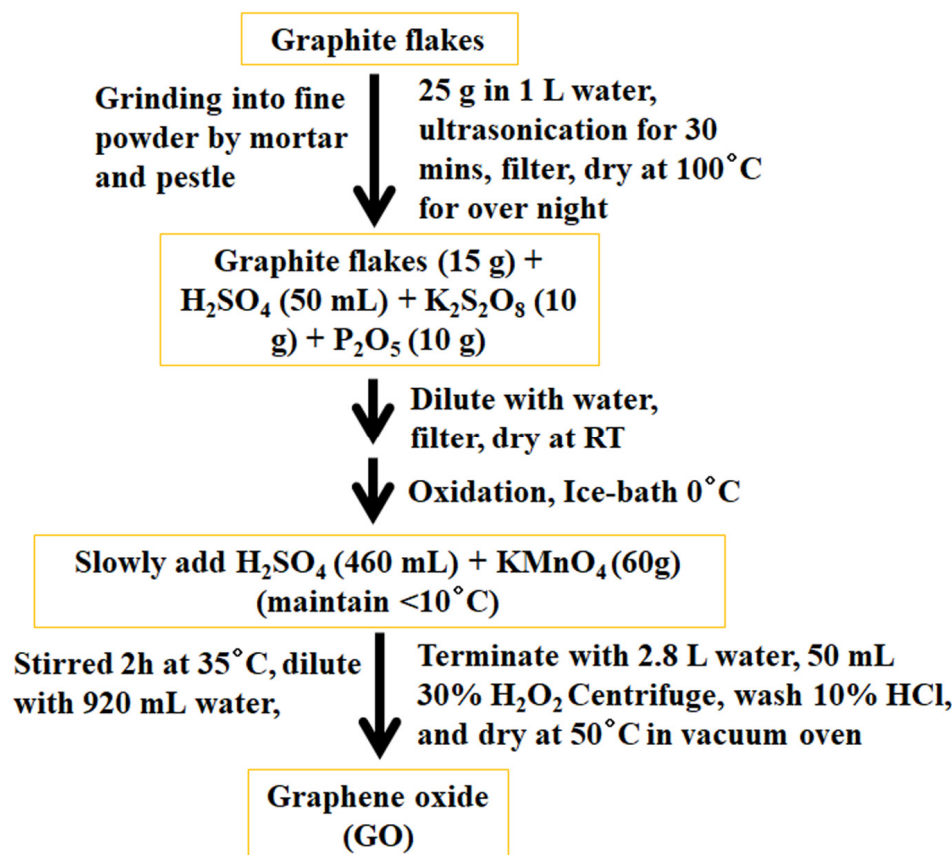

Figure S1. Flow chart for the synthesis of GO.

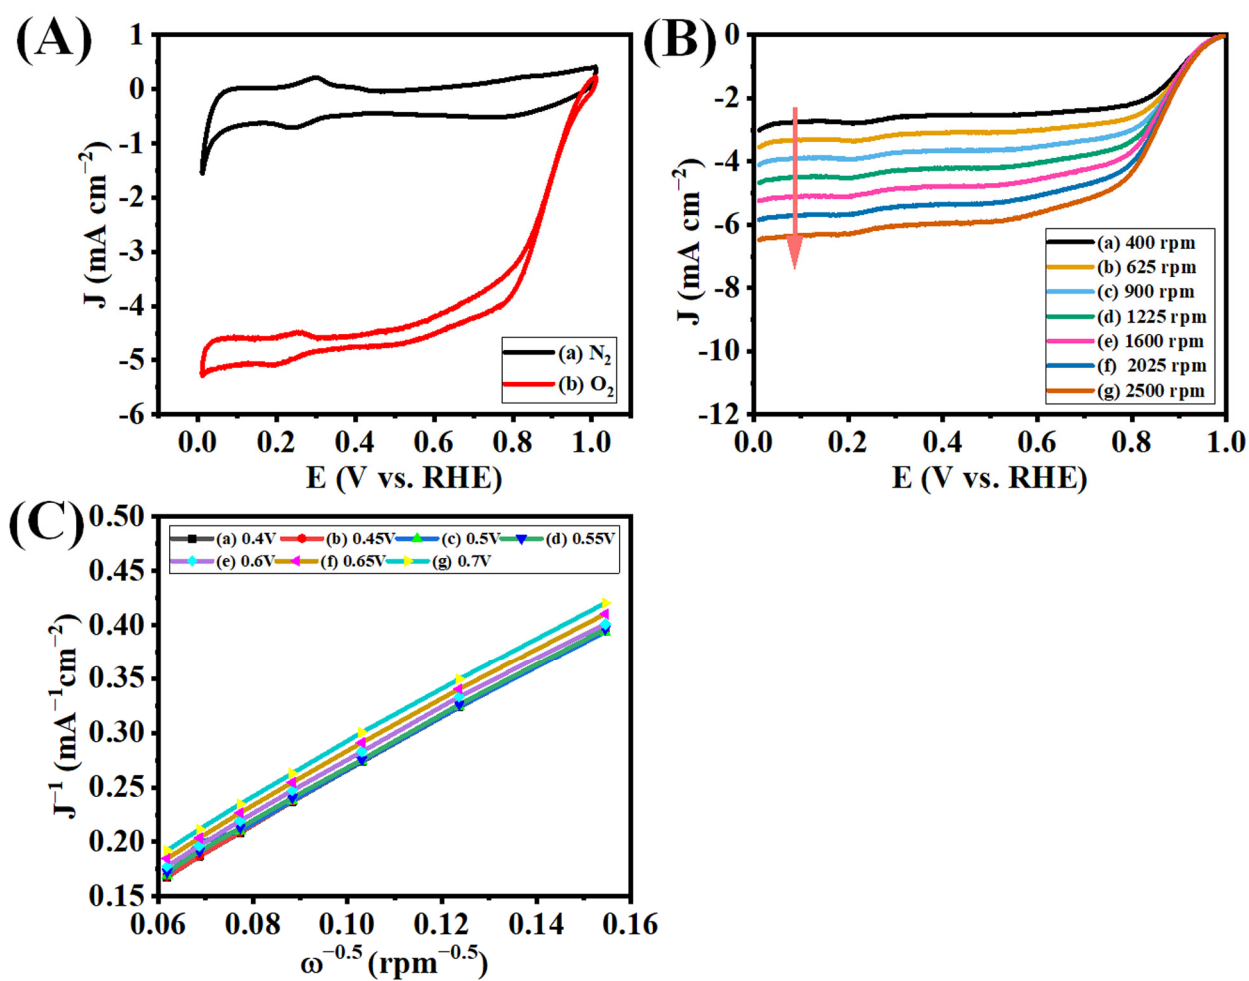

**Figure S2.** (A) CV graphs of Pt/C in N<sub>2</sub> and O<sub>2</sub> saturated aqueous 0.1M KOH electrolytes. (B and C) LSV at different rpm and K-L plots of Pt/C in O<sub>2</sub> saturated aqueous 0.1M KOH electrolyte at the rotation speed of 1600 rpm. All the experiments were performed at the scan rate of 10 mV s<sup>-1</sup> at room temperature.

**Table S1.** Comparison study of graphene-based electrocatalyst for ORR.

| Catalyst                | Electrolyte (KOH) | ORR onset potential ( $E_{\text{onset}}$ ) (V vs. RHE) | ORR $E_{1/2}$ (V vs. RHE) | Electron transfer number (n) | Ref.      |
|-------------------------|-------------------|--------------------------------------------------------|---------------------------|------------------------------|-----------|
| GO                      | 0.1 M             | 0.8                                                    | 0.66                      | 1.69                         | This Work |
| G100-1B                 | 0.1 M             | 0.84                                                   | 0.77                      | 3.76                         | This Work |
| G100-2B                 | 0.1 M             | 0.84                                                   | 0.74                      | 3.41                         | This Work |
| N-GRW                   | 0.1 M             | 0.92                                                   | 0.84                      | 3.95                         | [49]      |
| N-Graphene/CNT          | 0.1 M             | 0.88                                                   | 0.7                       | 3.22                         | [50]      |
| Fe <sub>3</sub> Co@NG-C | 0.1 M             | 1.03                                                   | 0.86                      | 3.90                         | [51]      |
| Ng-C@G                  | 0.1 M             | 0.96                                                   | 0.81                      | 3.96                         | [16]      |
| N-pGF                   | 0.1 M             | 0.86                                                   | 0.76                      | 3.9                          | [52]      |
| N-GA-150                | 0.1 M             | 0.65                                                   | 0.78                      | 3.7                          | [53]      |
| N-GDY                   | 0.1 M             | 0.65                                                   | 0.78                      | 3.7                          | [54]      |
| NGM                     | 0.1 M             | 0.89                                                   | 0.77                      | 3.8                          | [55]      |
| NPGC-950                | -                 | 0.91                                                   | 0.78                      | 3.79                         | [56]      |

## References

- Begum, H.; Ahmed, M.S.; Kim, Y.B. Nitrogen-Rich Graphitic-Carbon@graphene as a Metal-Free Electrocatalyst for Oxygen Reduction Reaction. *Sci. Rep.* **2020**, *10*, 12431.
- Yang, H. Bin; Miao, J.; Hung, S.-F.; Chen, J.; Tao, H.B.; Wang, X.; Zhang, L.; Chen, R.; Gao, J.; Chen, H.M.; et al. Identification of Catalytic Sites for Oxygen Reduction and Oxygen Evolution in N-Doped Graphene Materials: Development of Highly Efficient Metal-Free Bifunctional Electrocatalyst. *Sci. Adv.* **2016**, *2*, e1501122.
- Tian, G.-L.; Zhao, M.-Q.; Yu, D.; Kong, X.-Y.; Huang, J.-Q.; Zhang, Q.; Wei, F. Nitrogen-Doped Graphene/Carbon Nanotube Hybrids: In Situ Formation on Bifunctional Catalysts and Their Superior Electrocatalytic Activity for Oxygen Evolution/Reduction Reaction. *Small* **2014**, *10*, 2251–2259.
- Li, J.; Liu, J.-X.; Gao, X.; Goldsmith, B.R.; Cong, Y.; Zhai, Z.; Miao, S.; Jiang, Q.; Dou, Y.; Wang, J.; et al. Nitrogen-Doped Graphene Layers for Electrochemical Oxygen Reduction Reaction Boosted by Lattice Strain. *J. Catal.* **2019**, *378*, 113–120.
- Bang, G.S.; Shim, G.W.; Shin, G.H.; Jung, D.Y.; Park, H.; Hong, W.G.; Choi, J.; Lee, J.; Choi, S.-Y. Pyridinic-N-Doped Graphene Paper from Perforated Graphene Oxide for Efficient Oxygen Reduction. *ACS Omega* **2018**, *3*, 5522–5530.
- Xue, Q.; Ding, Y.; Xue, Y.; Li, F.; Chen, P.; Chen, Y. 3D Nitrogen-Doped Graphene Aerogels as Efficient Electrocatalyst for the Oxygen Reduction Reaction. *Carbon N. Y.* **2018**, *139*, 137–144.
- Lv, Q.; Si, W.; Yang, Z.; Wang, N.; Tu, Z.; Yi, Y.; Huang, C.; Jiang, L.; Zhang, M.; He, J.; et al. Nitrogen-Doped Porous Graphdiyne: A Highly Efficient Metal-Free Electrocatalyst for Oxygen Reduction Reaction. *ACS Appl. Mater. Interfaces* **2017**, *9*, 29744–29752.
- Tang, C.; Wang, H.-F.; Chen, X.; Li, B.-Q.; Hou, T.-Z.; Zhang, B.; Zhang, Q.; Titirici, M.-M.; Wei, F. Topological Defects in Metal-Free Nanocarbon for Oxygen Electrocatalysis. *Adv. Mater.* **2016**, *28*, 6845–6851.
- Men, B.; Sun, Y.; Li, M.; Hu, C.; Zhang, M.; Wang, L.; Tang, Y.; Chen, Y.; Wan, P.; Pan, J. Hierarchical Metal-Free Nitrogen-Doped Porous Graphene/Carbon Composites as an Efficient Oxygen Reduction Reaction Catalyst. *ACS Appl. Mater. Interfaces* **2016**, *8*, 1415–1423.
